# Supplementary material for: A novel chemiluminescence sensor for alpha-fetoprotein detection based on an aptamer–luminol modified magnetic graphene oxide and copper-based MOF composite
Source: Royal Society of Chemistry journal article supplement (doi:10.1039/d4ay01175a), 2024-01-01
Supplement: d4ay01175a1.pdf [file d4ay01175a1.pdf]

# **A novel chemiluminescence sensor for alpha-fetoprotein detection based on aptamer-luminol modified magnetic graphene oxide and copper-based MOFs composite**

Juntao Liu<sup>1</sup>, Xueying Wang<sup>2</sup>, Yuanling Sun<sup>2\*</sup>, Chuannan Luo<sup>2\*</sup>

<sup>1</sup>Henan University of Animal Husbandry and Economy, Zhengzhou 450046, China

<sup>2</sup>Key Laboratory of Interfacial Reaction & Sensing Analysis in Universities of Shandong, School of Chemistry and Chemical Engineering, University of Jinan, Jinan 250022, PR China

Corresponding author: Tel.: +86 0531 89736065. Dr. Yuanling Sun and Pro. Chuannan Luo are both the corresponding author of this article. E-mail address: chm\_sunyl@ujn.edu.cn (Yuanling Sun), chm\_yfl518@163.com (Chuannan Luo).

## Table of Contents

Reagents and apparatus

**Fig. S1** The IFFM-E chemiluminescence analyzer

**Fig. S2** The sensor photo diagram for AFP detection

**Fig. S3** The UV-vis curves of cDNA, MGO and MGO-cDNA

**Fig. S4** The saturated fixation amount (A) and equilibration time (B) of Apt-luminol on MGO-cDNA.

**Fig. S5** The mapping and EDS spectrum of ZnONPs-Au-CuMOFs

**Fig. S6** The BET characterization of Au@CuMOFs and ZnONPs-Au@CuMOFs

**Fig. S7** The CL curves of luminol and luminol+ZnONPs-Au@CuMOFs

The Lineweaver-Burk formula

**Fig. S8** The steady-state kinetic assay of Au@CuMOFs

**Fig. S9.** The CL intensity of ZnONPs-Au@CuMOFs with different free radical quenchers

**Fig. S10** The UV-vis curve of supernatant before and after PSA recognition

**Fig. S11** The CL curves and the CL intensity of AFP at different concentration

**Fig. S12** Optimizations of the CL sensor

## Reagents and apparatus

### *Reagents*

Luminol, trimesic acid (H<sub>3</sub>BTC), N,N-dimethylformamide (DMF), ethylene glycol, H<sub>2</sub>SO<sub>4</sub>, and zinc acetate were purchased from Shanghai Macleans Biochemical Technology Co., Ltd. Glutaraldehyde, methanol, disodium hydrogen phosphate, and sodium dihydrogen phosphate were purchased from Sinopharm Chemical Reagent Co., Ltd. Polyvinyl pyrrolidone (PVP), Hydrogen peroxide (H<sub>2</sub>O<sub>2</sub>) and sodium acetate were purchased from Tianjin Damao Chemical Reagent Factory. 6-Mercapto-1-hexanol (MCH), 1-(3-Dimethylaminopropyl)-3-ethylcarbodiimide (EDC, 95%) and N-hydroxysuccinimide (NHS, 99%) were purchased from Shanghai Civic Chemical Technology Co., Ltd. Tris(hydroxymethyl) aminomethane (Tris) was purchased from Shanghai Aladdin Biochemical Technology Co., Ltd. Alpha fetoprotein (AFP) and carcinoembryonic antigen (CEA) were purchased from Shanghai TargetMol Biological Technology Co., Ltd. Thrombin (THR), bovine serum albumin (BSA), tryptophan (Try) and Cysteine (Cys) were purchased from Beijing Suo Laibao Technology Co., Ltd. The aptamer of alpha fetoprotein (Apt) and the complementary strand of aptamer (AFP-cDNA) were synthesized and purchased by Shanghai Sangon Biotech Co., Ltd. The oligonucleotide sequences are follows: 5'-NH<sub>2</sub>-(CH<sub>2</sub>)<sub>6</sub>-ATCAGGTGCAGTTCTCGACTCGGTCTTGATGTGGG-3' (Apt), 5'-NH<sub>2</sub>-(CH<sub>2</sub>)<sub>6</sub>-CCCACATCAAGACCGCCACATCAAGACCG-3'(AFP-Apt). The Common reagents of NaCl NaOH, KOH and other chemicals were all analytical reagent grade. Ultra-pure water was used thoroughly in this work. Phosphate buffer

solution (PBS, 0.1 mol/L, pH = 7.2) was used to prepare all sample tube flow fluid.

### *Apparatus*

The morphology of the prepared materials was characterized by a scanning electron microscope (SEM, German SEM 300, Carl Zeiss, Germany). The internal crystal structure of the materials was characterized by an X-ray diffractometer (XRD, Model D8FOCUS, Bruker AXS, Germany). The functional groups of the synthetic materials were characterized by an infrared analyzer (FTIR, Model FT-1760X, PerkinElmer, USA). The specific surface area and pore size distribution of prepared materials were characterized by a specific surface area and pore size distribution meter (BET, AMD 2460, USA). The optical properties of the prepared synthetic were verified by an ultraviolet-visible spectrophotometer (UV-Vis, Spectrometer Co., Ltd. UV-2550) and a flow injection CL analyzer (Model IFFM-E, Xi'an Ruimai, China). The CL analyzer with IFFM-E system was used for AFP detection in the whole work.

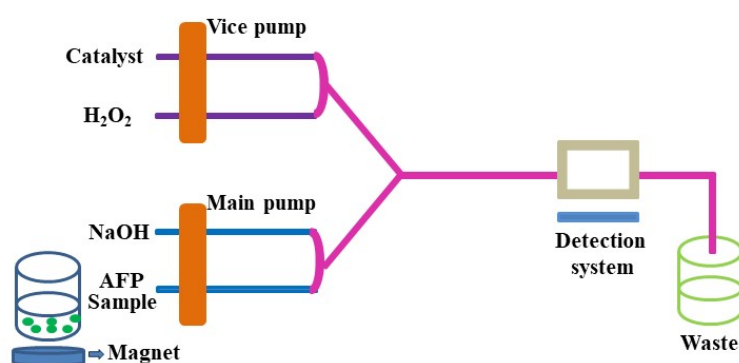

**Fig. S1.** The diagram of the IFFM-E CL analyzer for AFP detection.

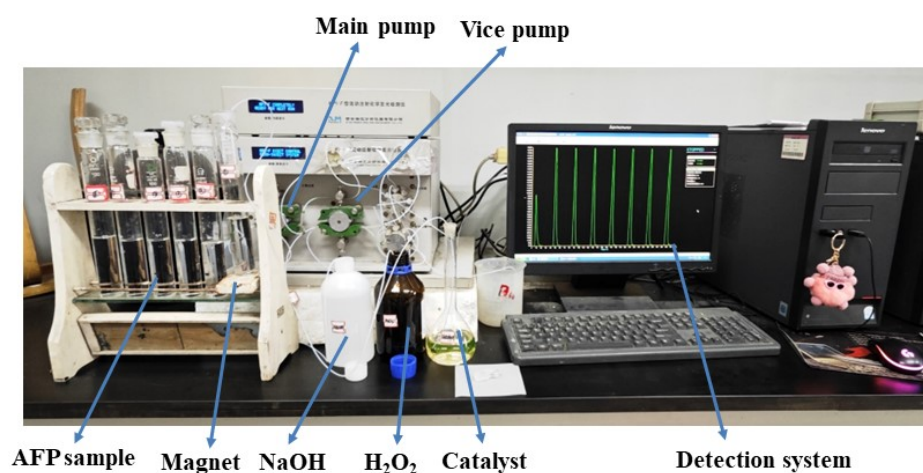

Fig. S2. The sensor photo diagram for AFP detection.

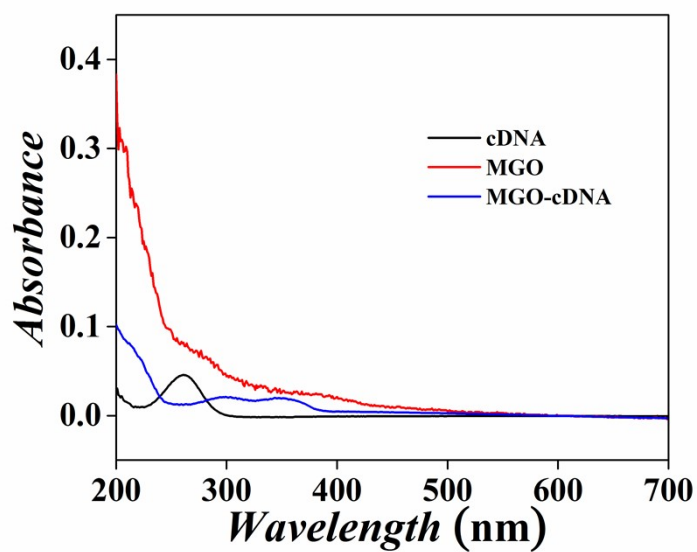

Fig. S3. The UV-vis curves of cDNA, MGO and MGO-cDNA.

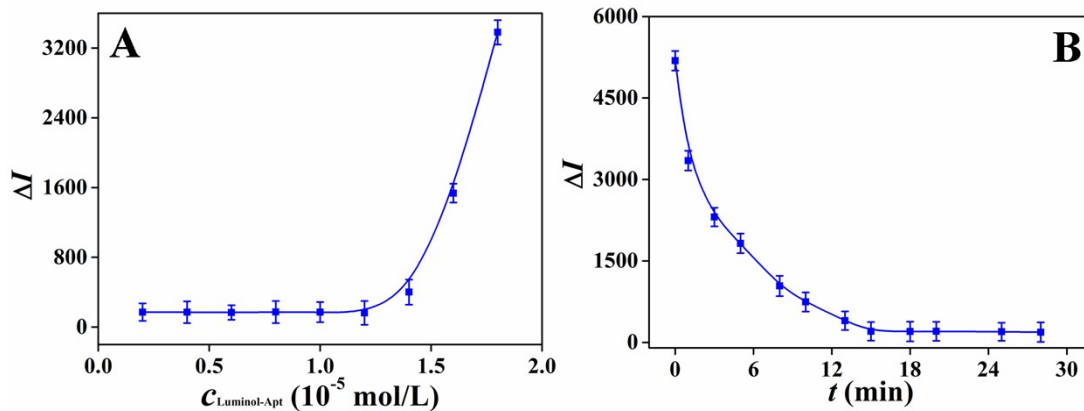

Fig. S4. The saturated fixation amount (A) and equilibration time (B) of Apt-luminol on MGO-cDNA.

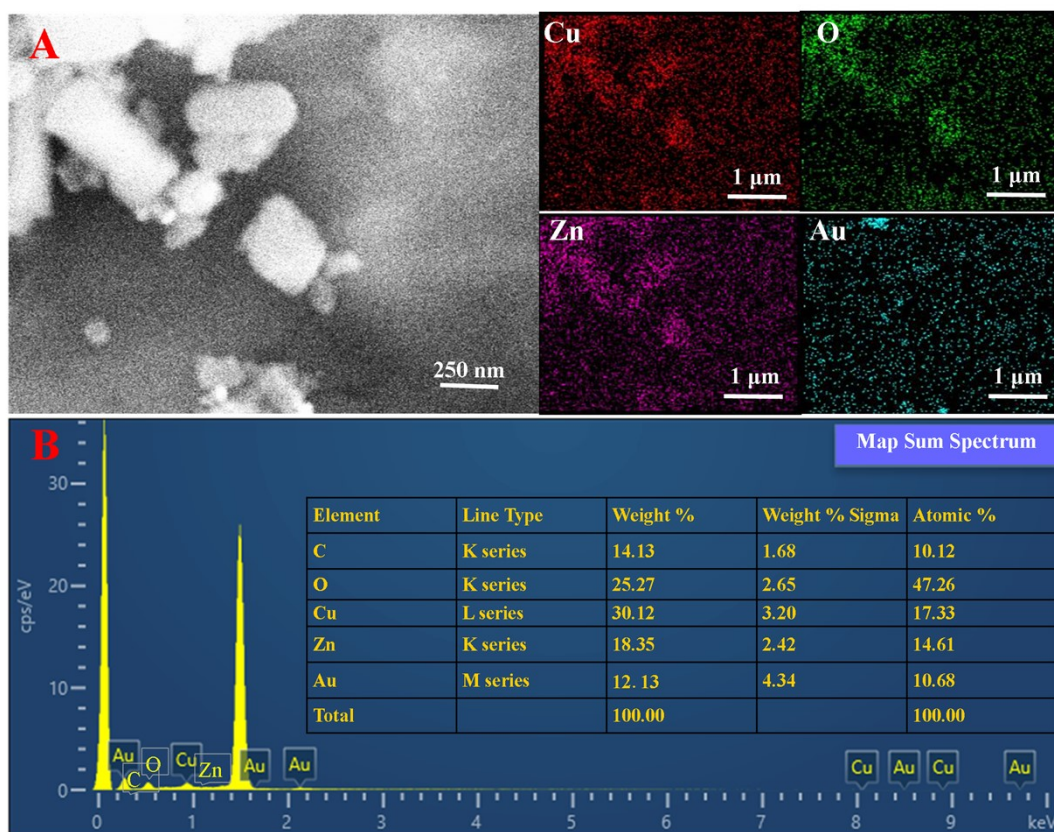

Fig. S5. The mapping and EDS spectrum of ZnONPs-Au-CuMOFs.

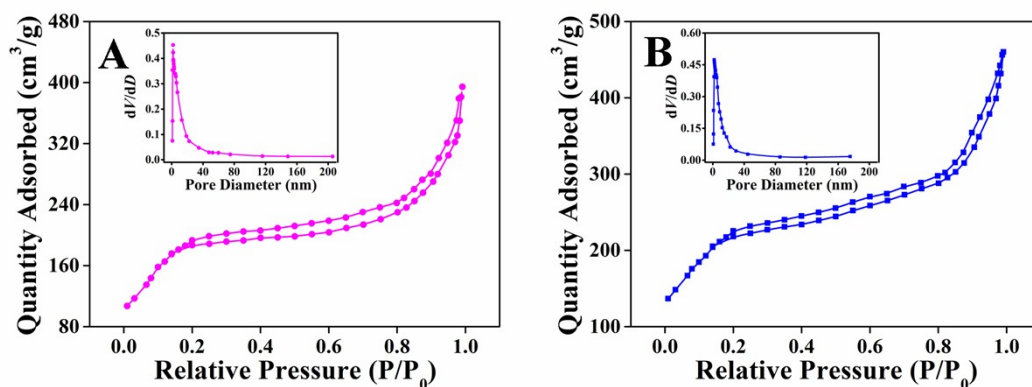

Fig. S6. The BET characterization of Au@CuMOFs (A) and ZnONPs-Au@CuMOFs (B), internal diagrams are pore size distribution diagram.

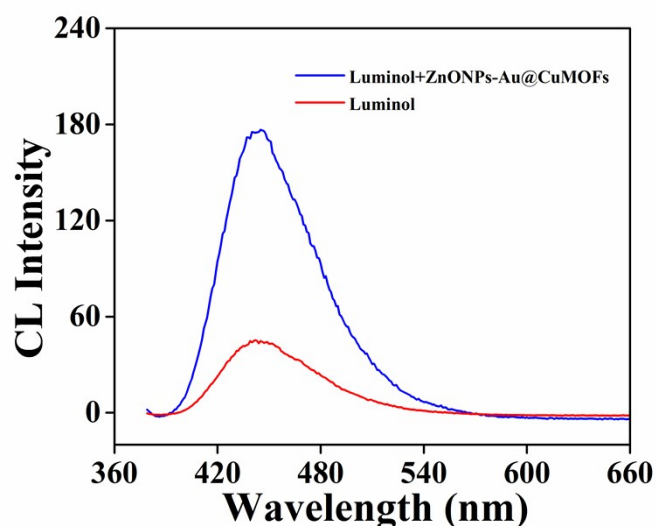

Fig. S7. The CL curves of luminol and luminol+ZnONPs-Au@CuMOFs, conditions:  $1.0 \times 10^{-6}$  mol/L luminol and 0.05 mg ZnONPs-Au@CuMOFs.

### The Lineweaver-Burk formula

Michaelis-Menten constant ( $K_m$ ) is known as an important parameter to evaluate the peroxidase activity. The Lineweaver-Burk formula is as followed:  $1/v = (K_m/v_{max})(1/[S]) + 1/v_{max}$ , where  $v$  is initial velocity,  $v_{max}$  is the maximum velocity, and  $[S]$  is concentration of substrate.

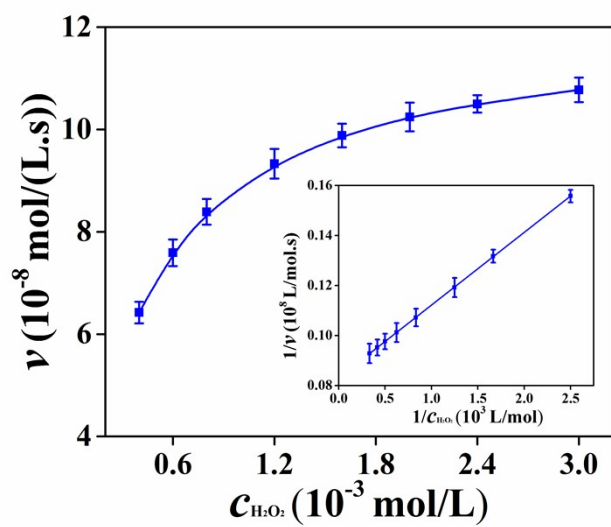

**Fig. S8.** The steady-state kinetic assay of Au@CuMOFs, error bars ( $n = 5$ ).

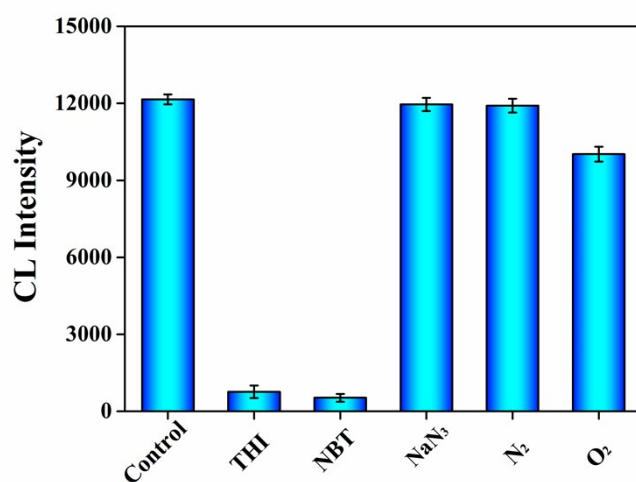

**Fig. S9.** The CL intensity of ZnONPs-Au@CuMOFs with  $1.5 \times 10^{-6}$  mol/L NaN<sub>3</sub>,  $2.5 \times 10^{-7}$  mol/L THI and NBT, N<sub>2</sub>-enriched and O<sub>2</sub>-enriched for 30 min, respectively, error bars ( $n = 5$ ).



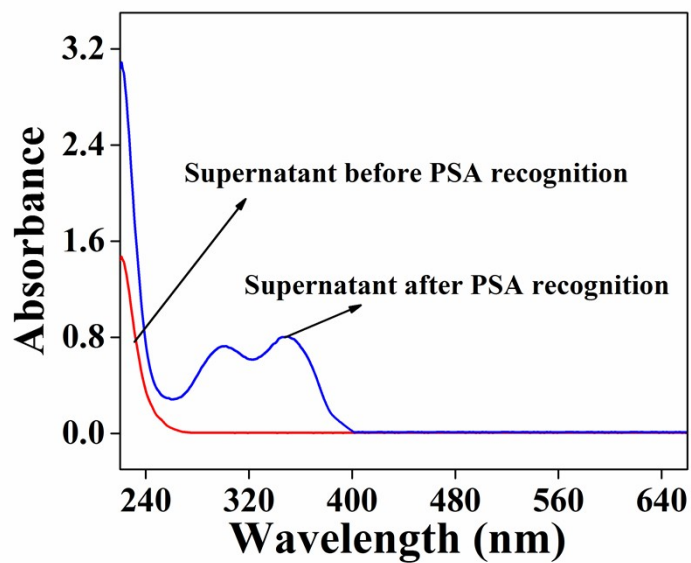

Fig. S10. The UV-vis curve of supernatant before and after PSA recognition

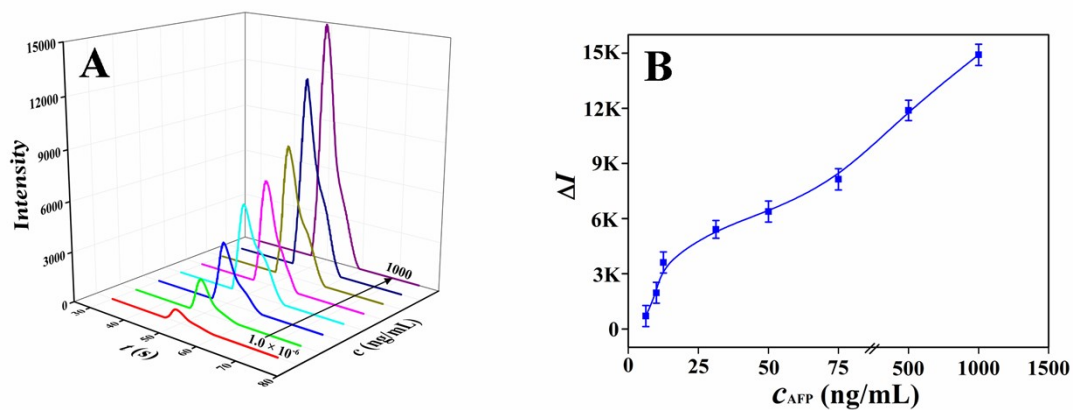

Fig. S11. The CL curves of AFP at different concentration (A) and the CL intensity of AFP at different concentration, error bars ( $n = 5$ ) (B).

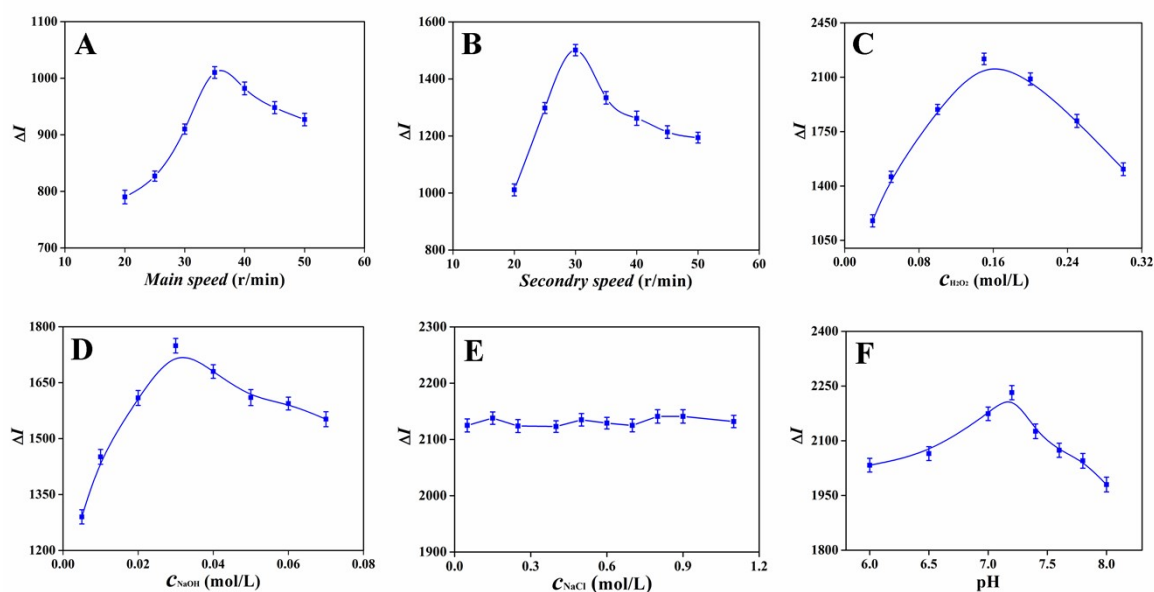

**Fig. S12.** Optimizations of main pump speed, conditions: 20 rpm of vice pump speed, 0.10 mol/L NaOH, 0.10 mol/L  $H_2O_2$ ,  $1.0 \times 10^{-6}$  mol/L MGO-cDNA/Apt-luminol, 10  $\mu\text{g/mL}$  ZnONPs-Au@CuMOFs, 1.0 ng/mL AFP (A); vice pump speed, conditions: 35 rpm of main pump speed, 0.10 mol/L NaOH, 0.10 mol/L  $H_2O_2$ ,  $1.0 \times 10^{-6}$  mol/L MGO-cDNA/Apt-luminol, 10  $\mu\text{g/mL}$  ZnONPs-Au@CuMOFs, 1.0 ng/mL AFP (B); the concentration of  $H_2O_2$ , conditions: 35 rpm of main pump speed, 30 rpm of vice pump speed, 0.10 mol/L NaOH,  $1.0 \times 10^{-6}$  mol/L MGO-cDNA/Apt-luminol, 10  $\mu\text{g/mL}$  ZnONPs-Au@CuMOFs, 1.0 ng/mL AFP (C); the concentration of NaOH, conditions: 35 rpm of main pump speed, 30 rpm of vice pump speed, 0.15 mol/L  $H_2O_2$ ,  $1.0 \times 10^{-6}$  mol/L MGO-cDNA/Apt-luminol, 10  $\mu\text{g/mL}$  ZnONPs-Au@CuMOFs, 1.0 ng/mL AFP (D); ion strength, conditions: 35 rpm of main pump speed, 30 rpm of vice pump speed, 0.03 mol/L NaOH, 0.15 mol/L  $H_2O_2$ ,  $1.0 \times 10^{-6}$  mol/L MGO-cDNA/Apt-luminol, 10  $\mu\text{g/mL}$  ZnONPs-Au@CuMOFs, 1.0 ng/mL AFP (E); pH, conditions: conditions: 35 rpm of main pump speed, 30 rpm of vice pump speed, 0.03 mol/L NaOH, 0.15 mol/L  $H_2O_2$ ,  $1.0 \times 10^{-6}$  mol/L MGO-cDNA/Apt-luminol, 10  $\mu\text{g/mL}$  ZnONPs-Au@CuMOFs, 1.0 ng/mL AFP (F).
